# Supplementary material
Source: PubMed Central journal article supplement (PMC4377727)
Supplement: thnov05p0583s1.pdf [file thnov05p0583s1.pdf]

# Zwitterionic poly(carboxybetaine)-based cationic liposomes for effective delivery of small interfering RNA therapeutics without accelerated blood clearance phenomenon

Yan Li <sup>1,2,\*</sup>, Ruiyuan Liu <sup>1,3,\*</sup>, Yuanjie Shi <sup>4</sup>, Zhenzhong Zhang <sup>3,✉</sup>, Xin Zhang <sup>1,✉</sup>

1. National Key Laboratory of Biochemical Engineering, Institute of Process Engineering, Chinese Academy of Sciences, Beijing, 100190, China

2. University of Chinese Academy of Sciences, Beijing, 100049, China

3. School of Pharmaceutical Sciences, Zhengzhou University, Zhengzhou, 450001, China

4. School of Life Sciences, University of Beijing Institute of Technology, Beijing, 100081, China

\* These authors contributed equally to this work.

✉ Corresponding author: [zhangzz08@126.com](mailto:zhangzz08@126.com) and [xzhang@ipe.ac.cn](mailto:xzhang@ipe.ac.cn)

## Supplementary Material

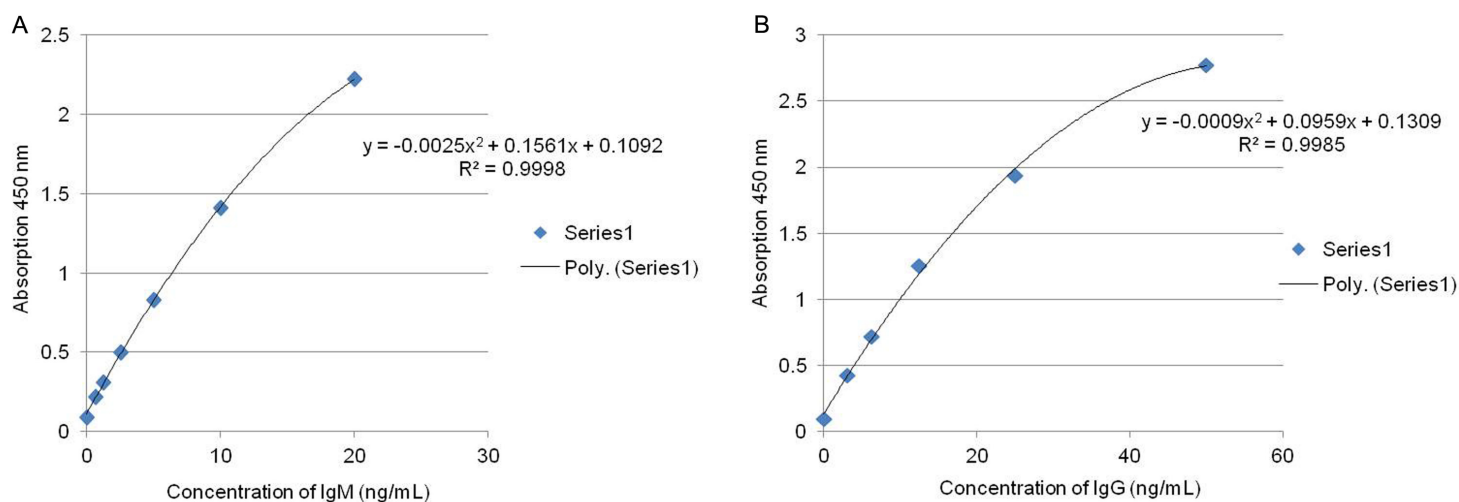

Figure S1. (A) The standard curve of IgM. (B) The standard curve of IgG.

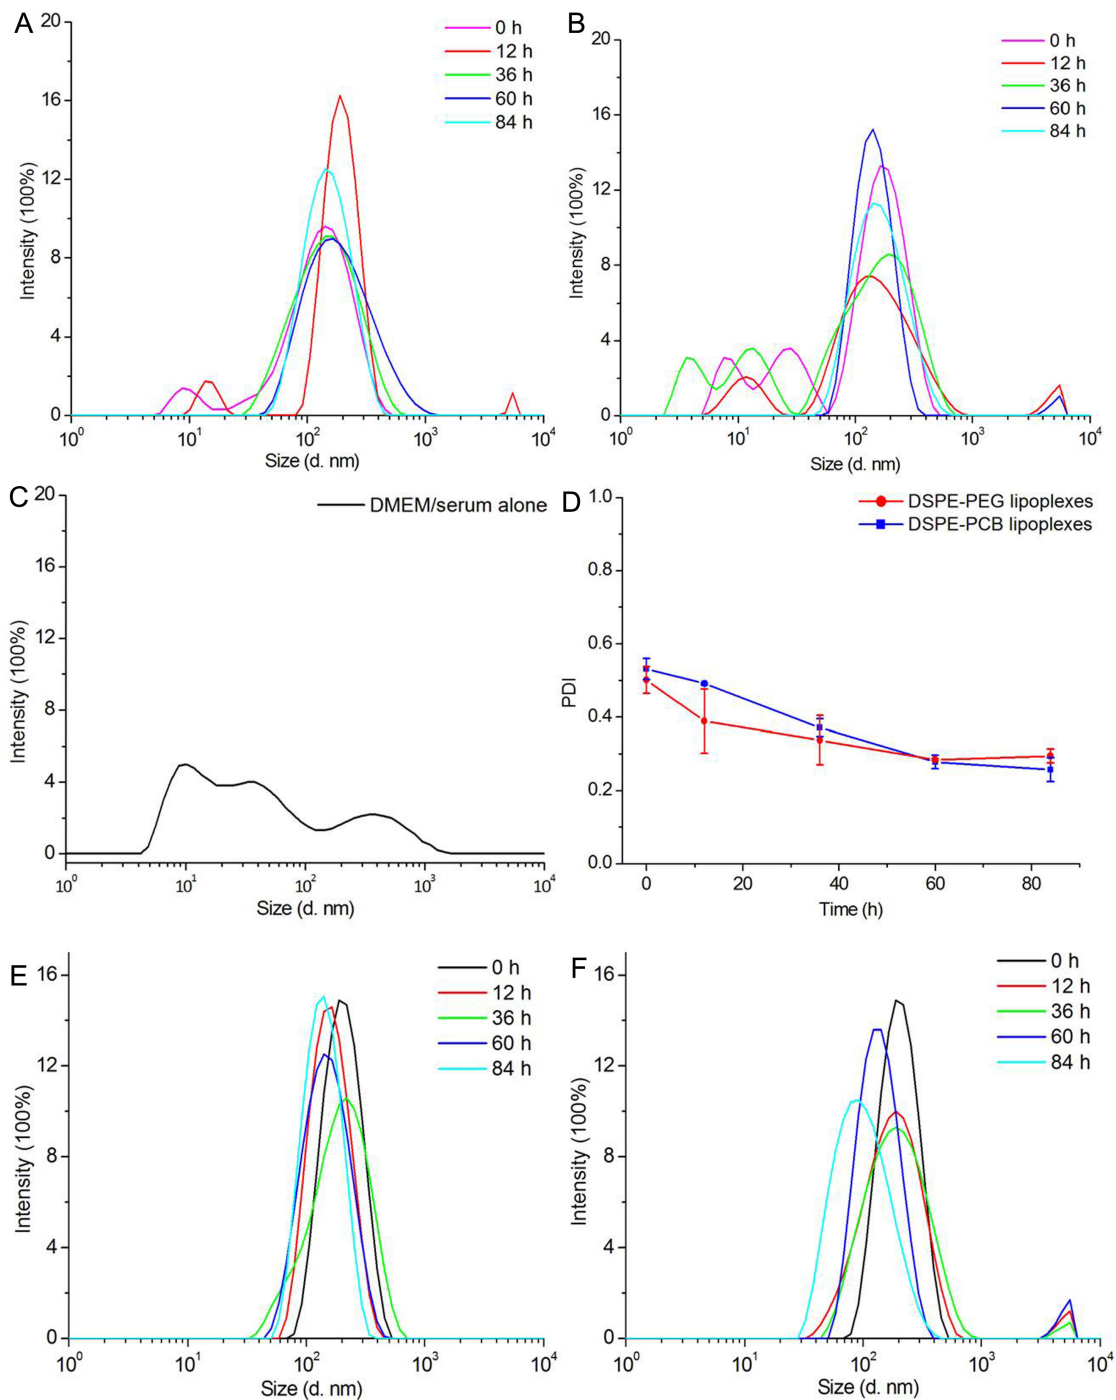

**Figure S2.** (A) The size distribution of DSPE-PEG lipoplexes in DMEM containing 10% FBS with the extension of time. (B) The size distribution of DSPE-PCB lipoplexes in DMEM containing 10% FBS with the extension of time. (C) The size distribution of DMEM containing 10% FBS. (D) The PDI values of the lipoplexes in the medium containing 10% FBS with the extension of time. (E) The size distribution of DSPE-PEG lipoplexes in DMEM with the extension of time. (F) The size distribution of DSPE-PCB lipoplexes in DMEM with the extension of time.
